# Supplementary material
Source: PubMed Central journal article supplement (PMC3609610)
Supplement: Supp_Figure1.pdf [file Supp_Figure1.pdf]

## Supplementary Data

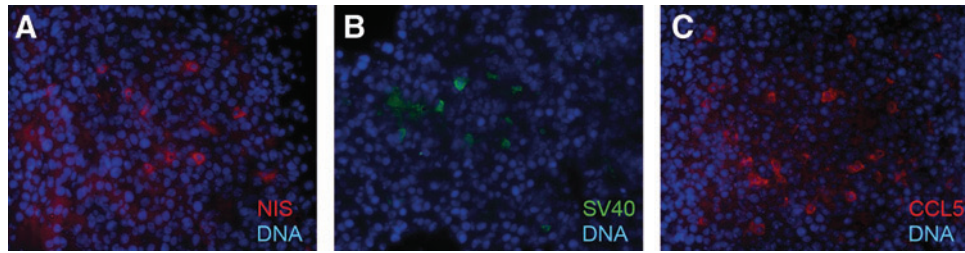

**SUPPLEMENTARY FIG. 1.** Immunohistochemical staining of radionuclide-negative Huh7 tumors after application of RANTES-NIS-MSCs. Radionuclide-negative Huh7 tumors revealed lower levels of NIS-specific immunoreactivity throughout the tumor stroma after application of RANTES-NIS-MSCs (A) with a similar distribution of SV40 large T Ag-positive cells (B) and in the presence of strong RANTES-specific immunoreactivity (C). Magnification: NIS, SV40 large T AG and RANTES/CCL5 staining:  $\times 200$
